# Supplementary material for: The Prognostic Value of Pulmonary Venous Flow Reversal in Patients with Significant Degenerative Mitral Regurgitation
Source: MDPI journal article supplement (doi:10.3390/jcdd10020049), 2023-01-28
Supplement: s1 [file s1]

**Supplemental Figure S1.** Five-Year Cumulative Incidence of the Combined Outcome of All-Cause Mortality, Mitral Intervention, or New-Onset Atrial Fibrillation According to Detailed Pulmonary Venous Flow Pattern at Baseline

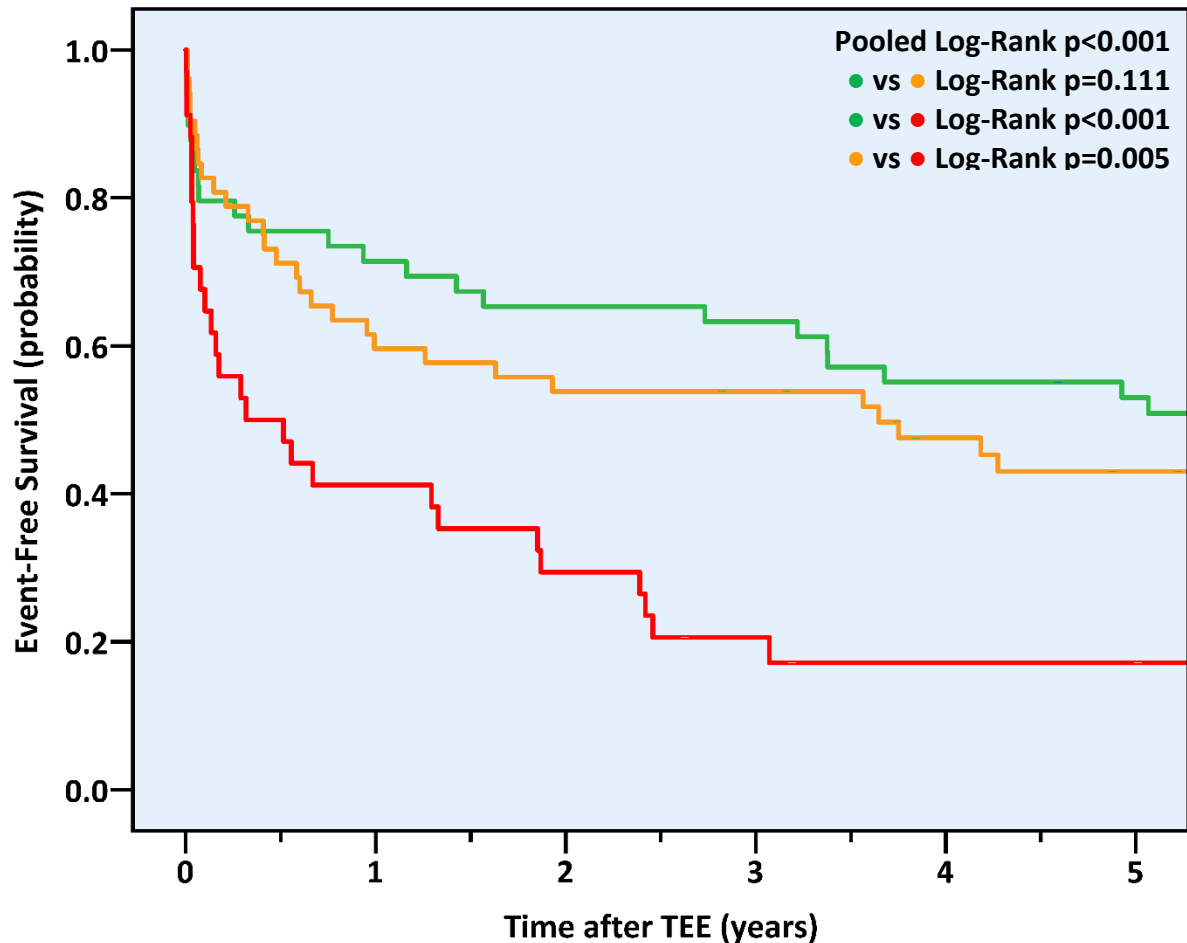

**No. at Risk**

|                      |    |    |    |    |    |    |
|----------------------|----|----|----|----|----|----|
| <b>Normal PVFP</b>   | 49 | 35 | 32 | 31 | 27 | 24 |
| <b>Blunted PVFP</b>  | 52 | 31 | 28 | 26 | 21 | 18 |
| <b>Reversed PVFP</b> | 34 | 14 | 10 | 6  | 4  | 4  |

PVFP = pulmonary venous flow pattern; TEE = transesophageal echocardiogram

**Supplemental Table S1.** Univariable Cox Proportional Hazard Model for the Combined Outcome of All-Cause Mortality, Mitral Intervention, or New-Onset Atrial Fibrillation at 5 Years

|                                     | HR (95% CI)       | P-Value      |
|-------------------------------------|-------------------|--------------|
| <b>Clinical Variables</b>           |                   |              |
| Age (continuous)                    | 0.99 (0.98-1.01)  | 0.475        |
| Sex Male                            | 1.04 (0.68-1.59)  | 0.859        |
| BMI (continuous)                    | 1.01 (0.96-1.06)  | 0.835        |
| BSA (continuous)                    | 1.18 (0.44-3.18)  | 0.746        |
| Hypertension                        | 0.73 (0.48-1.10)  | 0.133        |
| Diabetes Mellitus                   | 0.87 (0.43-1.72)  | 0.679        |
| NYHA Class (per 1 class rise)       | 1.36 (1.05-1.78)  | <b>0.021</b> |
| <b>Echocardiographic Parameters</b> |                   |              |
| Severe MR                           | 1.99 (1.27-3.13)  | <b>0.003</b> |
| MR PISA EROA                        |                   |              |
| Continuous                          | 4.86 (1.28-18.41) | <b>0.020</b> |
| ≥0.4cm <sup>2</sup>                 | 2.11 (1.06-4.21)  | <b>0.033</b> |
| MR PISA RVol                        |                   |              |
| Continuous                          | 1.01 (1.00-1.01)  | 0.064        |
| ≥60mL                               | 1.71 (0.79-3.72)  | 0.175        |
| Prolapse Site                       |                   |              |
| Anterior                            | 0.49 (0.24-1.03)  | 0.059        |
| Posterior                           | 1.67 (1.06-2.63)  | <b>0.028</b> |
| Both                                | 0.78 (0.46-1.32)  | 0.359        |
| LV ESD                              |                   |              |
| Continuous                          | 0.99 (0.97-1.01)  | 0.318        |
| ≥40mm                               | 0.56 (0.29-1.04)  | 0.068        |
| LA Diameter                         |                   |              |
| Continuous                          | 1.35 (1.02-1.79)  | <b>0.015</b> |
| >55mm                               | 1.48 (0.68-3.19)  | 0.325        |
| LA Area                             |                   |              |
| Continuous                          | 1.03 (1.01-1.050) | <b>0.017</b> |
| >20cm <sup>2</sup>                  | 1.07 (0.69-1.73)  | 0.770        |
| RV Dysfunction                      | 3.35 (0.82-13.73) | 0.093        |

## MR and PVFP Supplement

|                            |                  |                  |
|----------------------------|------------------|------------------|
| PASP                       |                  |                  |
| Continuous                 | 1.01 (0.99-1.03) | 0.164            |
| ≥50mmHg                    | 1.14 (0.69-1.86) | 0.613            |
| PVFP                       |                  | <b>&lt;0.001</b> |
| Reversed (vs Normal)       | 2.79 (1.66-4.70) | <b>&lt;0.001</b> |
| Reversed (vs Non-Reversed) | 2.28 (1.47-3.54) | <b>&lt;0.001</b> |

Figures in bold denote statistical significance.

BMI = body mass index; CI = confidence interval; EROA = effective regurgitant orifice area; ESD = end systolic diameter; HR = hazard ratio; LA = left atrial; LV = left ventricular; MR = mitral regurgitation; PASP = pulmonary arterial systolic pressure; NYHA = New York Heart Association; PISA = proximal isovelocity surface area; PVFP = pulmonary venous flow pattern; RV = right ventricular; RVol = regurgitant volume

# MR and PVFP Supplement

**Supplemental Table S2.** Cox Proportional Hazard Model for the Separate Outcomes at 5 Years

|                                     | All-Cause Mortality |         |                  |              | Mitral Intervention |         |                  |              | New-Onset Atrial Fibrillation |         |                   |         |
|-------------------------------------|---------------------|---------|------------------|--------------|---------------------|---------|------------------|--------------|-------------------------------|---------|-------------------|---------|
|                                     | Univariable         |         | Multivariable    |              | Univariable         |         | Multivariable    |              | Univariable                   |         | Multivariable     |         |
|                                     | HR (95% CI)         | P-Value | HR (95% CI)      | P-Value      | HR (95% CI)         | P-Value | HR (95% CI)      | P-Value      | HR (95% CI)                   | P-Value | HR (95% CI)       | P-Value |
| <b>Clinical Variables</b>           |                     |         |                  |              |                     |         |                  |              |                               |         |                   |         |
| Age (continuous)                    | 1.08 (1.01-1.15)    | 0.027   | 1.07 (0.98-1.18) | 0.145        | 0.99 (0.98-1.01)    | 0.405   |                  |              | 1.04 (0.99-1.07)              | 0.070   | 1.03 (0.98-1.08)  | 0.261   |
| Sex Male                            | 1.94 (0.42-8.96)    | 0.398   |                  |              | 1.26 (0.78-2.04)    | 0.336   |                  |              | 0.72 (0.30-1.71)              | 0.456   |                   |         |
| BMI (continuous)                    | 1.16 (1.03-1.29)    | 0.011   | 1.26 (1.08-1.47) | <b>0.004</b> | 1.01 (0.96-1.07)    | 0.675   |                  |              | 1.02 (0.91-1.14)              | 0.726   |                   |         |
| Hypertension                        | 55.15 (0.33-92.51)  | 0.125   |                  |              | 0.64 (0.42-0.99)    | 0.048   | 0.39 (0.22-0.67) | <b>0.001</b> | 0.95 (0.41-2.21)              | 0.911   |                   |         |
| Diabetes Mellitus                   | 1.01 (0.13-7.94)    | 0.996   |                  |              | 1.33 (0.67-2.66)    | 0.419   |                  |              | 0.93 (0.22-3.96)              | 0.918   |                   |         |
| NYHA Class (per 1 class rise)       | 2.19 (1.08-4.46)    | 0.031   | 2.36 (0.74-7.55) | 0.148        | 1.59 (1.18-2.15)    | 0.002   |                  |              | 1.39 (0.80-2.41)              | 0.245   |                   |         |
| <b>Echocardiographic Parameters</b> |                     |         |                  |              |                     |         |                  |              |                               |         |                   |         |
| Severe MR                           | 0.91 (0.27-3.09)    | 0.873   |                  |              | 1.97 (1.21-3.20)    | 0.006   | 1.51 (0.80-2.85) | 0.205        | 5.63 (1.32-24.11)             | 0.020   | 6.21 (0.79-48.38) | 0.081   |
| MR PISA EROA                        |                     |         |                  |              |                     |         |                  |              |                               |         |                   |         |
| Continuous                          | 11.17 (0.59-21.85)  | 0.107   |                  |              | 4.51 (1.10-18.36)   | 0.036   |                  |              | 4.16 (0.68-25.60)             | 0.124   |                   |         |
| ≥0.4cm <sup>2</sup>                 | 1.55 (0.16-14.90)   | 0.705   |                  |              | 2.12 (1.00-4.48)    | 0.050   |                  |              | 7.09 (0.92-54.57)             | 0.060   |                   |         |
| MR PISA RVol                        |                     |         |                  |              |                     |         |                  |              |                               |         |                   |         |
| Continuous                          | 1.00 (0.99-1.02)    | 0.448   |                  |              | 1.00 (0.99-1.01)    | 0.299   |                  |              | 1.00 (0.99-1.01)              | 0.401   |                   |         |
| ≥60mL                               | 33.79 (0.03-95.20)  | 0.455   |                  |              | 1.35 (0.61-2.97)    | 0.459   |                  |              | 36.85 (0.22-62.34)            | 0.168   |                   |         |
| Prolapse Site                       |                     |         |                  |              |                     |         |                  |              |                               |         |                   |         |
| Anterior                            | 0.75 (0.10-5.86)    | 0.784   |                  |              | 0.55 (0.26-1.20)    | 0.134   |                  |              | 0.36 (0.05-2.68)              | 0.319   |                   |         |
| Posterior                           | 1.22 (0.32-4.59)    | 0.773   |                  |              | 1.59 (0.98-2.58)    | 0.062   | 2.21 (0.89-4.11) | 0.102        | 1.64 (0.60-4.44)              | 0.334   |                   |         |

## MR and PVFP Supplement

|                                         |                   |       |  |  |                   |        |                  |              |                    |        |                    |              |
|-----------------------------------------|-------------------|-------|--|--|-------------------|--------|------------------|--------------|--------------------|--------|--------------------|--------------|
| Both                                    | 0.92 (0.20-4.24)  | 0.910 |  |  | 0.77 (0.44-1.35)  | 0.363  |                  |              | 0.85 (0.29-2.50)   | 0.763  |                    |              |
| LV ESD                                  |                   |       |  |  |                   |        |                  |              |                    |        |                    |              |
| Continuous                              | 1.02 (0.95-1.08)  | 0.626 |  |  | 0.99 (0.97-1.02)  | 0.704  |                  |              | 1.00 (0.96-1.05)   | 0.951  |                    |              |
| ≥40mm                                   | 2.09 (0.56-7.89)  | 0.276 |  |  | 0.60 (0.31-1.16)  | 0.126  |                  |              | 0.79 (0.23-2.67)   | 0.706  |                    |              |
| LA Diameter                             |                   |       |  |  |                   |        |                  |              |                    |        |                    |              |
| Continuous                              | 1.26 (0.57-2.79)  | 0.572 |  |  | 1.16 (0.86-1.55)  | 0.331  |                  |              | 1.34 (0.74-2.42)   | 0.328  |                    |              |
| >55mm                                   | 4.15 (0.90-19.28) | 0.069 |  |  | 0.91 (0.37-2.25)  | 0.838  |                  |              | 0.84 (0.11-6.22)   | 0.861  |                    |              |
| LA Area                                 |                   |       |  |  |                   |        |                  |              |                    |        |                    |              |
| Continuous                              | 1.04 (0.98-1.10)  | 0.251 |  |  | 1.02 (0.99-1.05)  | 0.117  |                  |              | 1.06 (1.02-1.11)   | 0.006  | 1.06 (1.03-1.12)   | <b>0.038</b> |
| >20cm <sup>2</sup>                      | 1.40 (0.30-6.48)  | 0.667 |  |  | 1.21 (0.67-1.86)  | 0.661  |                  |              | 3.40 (0.80-14.56)  | 0.099  |                    |              |
| RV Dysfunction                          | 0.05 (0.00-92.33) | 0.774 |  |  | 2.47 (0.61-10.09) | 0.207  |                  |              | 33.34 (6.88-61.70) | <0.001 | 10.54 (1.17-94.99) | <b>0.036</b> |
| PASP                                    |                   |       |  |  |                   |        |                  |              |                    |        |                    |              |
| Continuous                              | 1.02 (0.98-1.07)  | 0.342 |  |  | 1.00 (0.99-1.02)  | 0.642  |                  |              | 1.04 (1.01-1.06)   | 0.012  | 0.99 (0.96-1.04)   | 0.964        |
| ≥50mmHg                                 | 0.43 (0.06-3.33)  | 0.417 |  |  | 1.01 (0.59-1.73)  | 0.981  |                  |              | 2.22 (0.90-5.44)   | 0.082  |                    |              |
| PVFP                                    |                   |       |  |  |                   |        |                  |              |                    |        |                    | 0.051        |
| Reversed (vs Normal)                    | 1.60 (0.23-11.36) | 0.639 |  |  | 2.78 (1.61-4.81)  | <0.001 | 1.98 (1.03-4.35) | <b>0.009</b> | 1.55 (0.39-6.21)   | 0.534  |                    |              |
| Reversed (vs Non-Reversed)              | 0.70 (0.15-3.23)  | 0.697 |  |  | 2.24 (1.42-3.54)  | 0.001  | 1.58 (1.35-2.97) | <b>0.016</b> | 0.64 (0.22-1.89)   | 0.419  |                    |              |
| <b>Competing Risks</b>                  |                   |       |  |  |                   |        |                  |              |                    |        |                    |              |
| Mitral Intervention Before AF           | 0.44 (0.14-1.45)  | 0.443 |  |  | NA                | NA     |                  |              | 0.63 (0.27-1.45)   | 0.275  |                    |              |
| New-Onset AF Before Mitral Intervention | 1.07 (0.23-4.94)  | 0.933 |  |  | 0.54 (0.22-1.32)  | 0.175  |                  |              | NA                 | NA     |                    |              |

Figures in bold denote statistical significance.

## MR and PVFP Supplement

AF = atrial fibrillation; BMI = body mass index; CI = confidence interval; EROA = effective regurgitant orifice area; ESD = end systolic diameter; HR = hazard ratio; LA = left atrial; LV = left ventricular; MR = mitral regurgitation; MRA = mineralocorticoid receptor antagonist; NYHA = New York Heart Association; PASP = pulmonary arterial systolic pressure; PISA = proximal isovelocity surface area; PVFP = pulmonary venous flow pattern; RV = right ventricular; RVol = regurgitant volume
